# Supplementary material for: Protein Kinase C-ζ Activation Markedly Enhances β-Cell Proliferation
Source: Oxford University Press journal article supplement (doi:10.2337/db07-0461), 2007-09-05
Supplement: db070461onlineappenfiglegend.doc [file db070461onlineappenfiglegend.doc]

**Supplemental** **Figure 1.** Glucose homeostasis and insulin secretion in normal and transgenic mice. Blood obtained by retro-orbital bleed was analyzed for **(A)** glucose, measured with a portable glucometer (Medisense, Bedford, MA), and **(B)** plasma insulin measured by radioimmunoassay (Linco Research, St. Louis, MO), and insulin/glucose ratios were determined in normal (NL) (n=22), single-transgenic PTHrP (n=20-22) or HGF (n=19-22), and DT (n=20) mice under 18-20h fasting and non-fasting conditions. *P<0.01 and **P<0.05 vs. NL. Blood glucose or insulin/glucose values were not significantly different among the different transgenic mice. **(C)** Intraperitoneal glucose tolerance test (IPGTT) was performed in 16-18h fasted NL (n=16), single-transgenic PTHrP (n=16) or HGF (n=15), and DT (n=11) mice injected ip with 2g D-glucose/kg body wt. **(D)** Area under the curve from IPGTT experiments shows no significant difference among the different transgenic mice, *P<0.01 vs. NL. **(E)** Glucose-stimulated insulin secretion (GSIS) was measured in triplicate in groups of 10 islets from NL (n=11), single-transgenic PTHrP (n=10) or HGF (n=10), and DT (n=7) mice, incubated with 5.5 or 22mM glucose for 30min. *P<0.01, islets at 22mM vs. at 5.5mM glucose; #P<0.01 single-transgenic and DT islets at 22mM vs. normal islets at 22mM glucose. As previously reported in the original background (15), single-transgenic HGF islets in this new mixed background also secrete significantly (**P<0.05) more insulin than normal islets at 5.5mM glucose.

**Supplemental Figure 2.** cAMP and iCa2+ levels in HGF- and PTHrP-treated INS-1 cells. **(A)** Adenylyl cyclase activity was measured by cAMP accumulation using a cAMP immunoassay kit (R&D Systems Inc., Minneapolis, MN) following manufacturer’s instructions. INS-1 cells (105 cells/well) were serum-depleted in RPMI medium containing 2mM D-glucose for 24h, washed with Krebs-Ringer buffer (KRB), pH 7.4, containing 2mM D-glucose and then treated with 1mM 3-isobutyl-1-methylxanthine for 10min followed by incubation with the indicated peptides for 30min. The reaction was terminated by the addition of 0.1N HCl, followed by neutralization with 0.1N NaOH. PTHrP[1-36] and HGF (50ng/ml) failed to increase cAMP accumulation in INS-1 cells, whereas 10nM GLP-1 or 50µM forskolin, used as positive controls, were able to stimulate cAMP accumulation in these cells. (n=2 in triplicate). **(B)** Free iCa2+ was measured in INS-1 cells loaded with 2µM Fura-2 for 30min at 37°C in KRB containing 2mM D-glucose using a dual excitation microfluorescence system. These representatives experiments indicate that either 25ng/ml HGF or 100nM PTHrP[1-36] failed to stimulate changes in iCa2+, while these levels rapidly increased with 25mM KCl or with 10nM GLP-1 plus 20mM glucose (not shown). These experiments were repeated 3-5 times with identical results.

**Supplemental Figure 3.** Densitometric quantitation of three to five western blots for the proteins described in Figure 3. *P<0.05 vs. untreated cells.

**Supplemental Figure 4.** Effect of the PI3K inhibitor wortmannin on PKCζ/ι/λ phosphorylation in INS-1 cells. **(A)** Western blot showing the phosphorylation levels of PKCζ/ι/λ (Thr410/403) in INS-1 cells treated with 100nM wortmannin for 1h and with 0.1 µM PTHrP[1-36] (P), 25ng/ml HGF (H) and the combination of these growth factors (P+H) during the last 30 min. Cells were previously serum-depleted for 24h in medium containing 2mM glucose. **(B)** Densitometric quantitation of 3 different experiments. *P<0.05 vs. untreated cells.
